# Supplementary material for: Conductive biofoams of wheat gluten containing carbon nanotubes, carbon black or reduced graphene oxide
Source: Royal Society of Chemistry journal article supplement (doi:10.1039/c7ra01082f), 2017-01-01
Supplement: c7ra01082f1.pdf [file c7ra01082f1.pdf]

Supplementary information

**“Conductive biofoams of wheat gluten containing carbon nanotubes, carbon black or reduced graphene oxide”**

Qiong Wu<sup>a</sup>, Henrik Sundborg<sup>a</sup>, Richard L. Andersson<sup>a</sup>, Kevin Peuvot<sup>a</sup>, Léonard Guex<sup>a</sup>, Fritjof Nilsson<sup>a</sup>, Mikael S. Hedenqvist<sup>a</sup>, Richard T. Olsson<sup>a\*</sup>

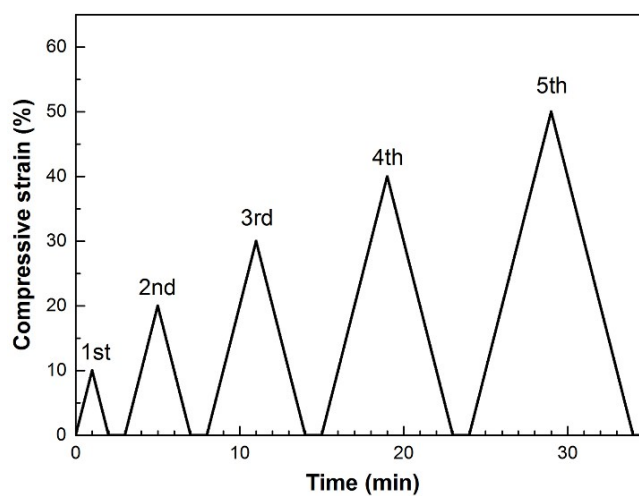

Fig. S1 Compressive strain as a function of time performed in the cyclic compression test

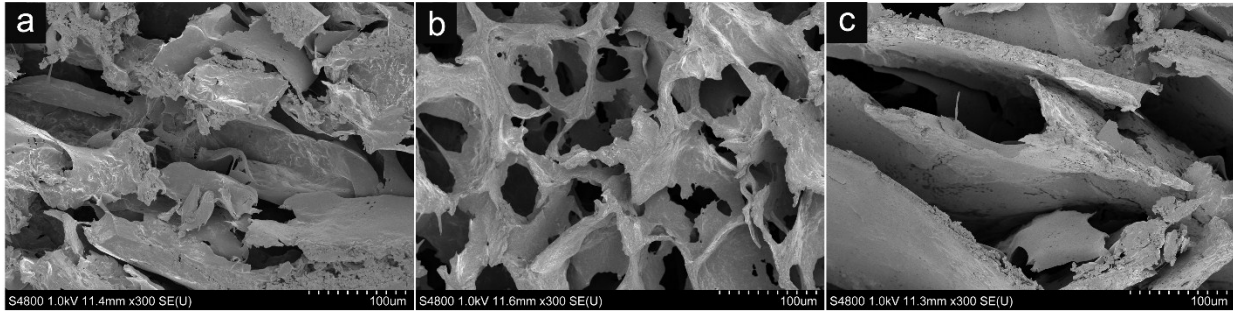

Fig. S2 SEM micrographs showing the cross-sections of plasticised-WG foams with (a) 0.41 vol.% CNT, (b) 0.44 vol.% CB, (c) 0.39 vol.% rGO after compressed to 60 %

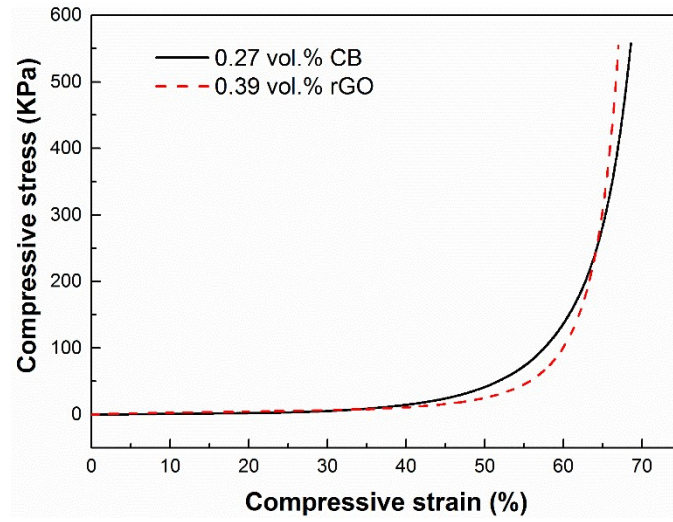

Fig. S3 Stress-strain curves of plasticised-WG foams with 0.27 vol.% CB (solid black) and 0.39 vol.% rGO (dash red)

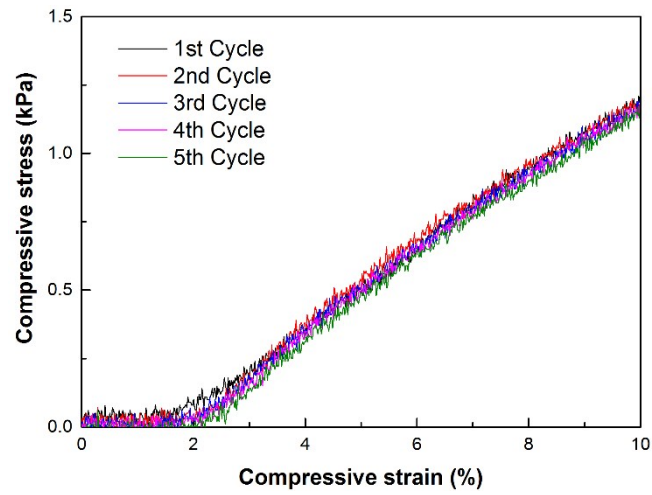

Fig. S4 Cyclic compression test of CNT(0.41) foam compressed to 10 % strain on each cycle (The flat region at strain 0-2% was due to the preloading)
